# Supplementary material for: Solar wind magnetosonic mach number as a control variable for energy dissipation during magnetic storms
Source: Frontiers journal article supplement (doi:10.3389/fspas.2022.960535), 2022-09-30
Supplement: Table_1.pdf [file Table_1.pdf]

## APPENDIX A: LIST OF STORMS

335 List of Storm Event Used in This Study.

336 Start times and durations are for the main phase of the storms.

| #  | Start Date         | Start Time (UT) | Duration (hour) | min $D_{st}^*$ |
|----|--------------------|-----------------|-----------------|----------------|
| 1  | January 11, 2000   | 14              | 8               | -102           |
| 2  | January 22, 2000   | 16              | 12              | -129           |
| 3  | January 27, 2000   | 19              | 7               | -66            |
| 4  | February 5, 2000   | 17              | 6               | -64            |
| 5  | February 12, 2000  | 8               | 4               | -169           |
| 6  | March 1, 2000      | 3               | 13              | -65            |
| 7  | March 31, 2000     | 5               | 7               | -82            |
| 8  | April 1, 2000      | 15              | 10              | -70            |
| 9  | April 4, 2000      | 12              | 7               | -74            |
| 10 | April 6, 2000      | 16              | 9               | -336           |
| 11 | April 16, 2000     | 7               | 5               | -103           |
| 12 | April 24, 2000     | 10              | 5               | -81            |
| 13 | April 27, 2000     | 8               | 9               | -51            |
| 14 | May 17, 2000       | 0               | 6               | -119           |
| 15 | May 24, 2000       | 1               | 4               | -173           |
| 16 | May 29, 2000       | 16              | 6               | -74            |
| 17 | June 8, 2000       | 15              | 5               | -115           |
| 18 | July 20, 2000      | 1               | 9               | -112           |
| 19 | July 22, 2000      | 6               | 12              | -85            |
| 20 | July 23, 2000      | 12              | 11              | -84            |
| 21 | August 5, 2000     | 20              | 10              | -76            |
| 22 | August 10, 2000    | 20              | 11              | -122           |
| 23 | August 12, 2000    | 2               | 8               | -259           |
| 24 | August 28, 2000    | 21              | 10              | -83            |
| 25 | September 1, 2000  | 23              | 12              | -76            |
| 26 | September 6, 2000  | 19              | 14              | -50            |
| 27 | September 12, 2000 | 9               | 11              | -97            |
| 28 | September 17, 2000 | 19              | 5               | -241           |
| 29 | September 19, 2000 | 8               | 8               | -104           |
| 30 | October 3, 2000    | 1               | 12              | -100           |
| 31 | October 4, 2000    | 7               | 14              | -166           |
| 32 | October 5, 2000    | 3               | 5               | -213           |
| 33 | October 5, 2000    | 11              | 3               | -216           |
| 34 | October 12, 2000   | 23              | 7               | -104           |
| 35 | October 14, 2000   | 2               | 13              | -127           |
| 36 | October 28, 2000   | 20              | 8               | -146           |
| 37 | November 4, 2000   | 3               | 7               | -74            |
| 38 | November 6, 2000   | 13              | 9               | -191           |
| 39 | November 10, 2000  | 6               | 7               | -123           |
| 40 | November 18, 2000  | 18              | 13              | -44            |

|    |                    |    |    |      |
|----|--------------------|----|----|------|
| 41 | November 24, 2000  | 18 | 5  | -54  |
| 42 | November 26, 2000  | 17 | 4  | -77  |
| 43 | November 26, 2000  | 22 | 4  | -111 |
| 44 | November 29, 2000  | 6  | 8  | -146 |
| 45 | January 3, 2001    | 1  | 6  | -56  |
| 46 | January 24, 2001   | 10 | 9  | -80  |
| 47 | January 31, 2001   | 8  | 4  | -65  |
| 48 | February 6, 2001   | 6  | 3  | -57  |
| 49 | February 13, 2001  | 17 | 5  | -72  |
| 50 | March 4, 2001      | 18 | 9  | -98  |
| 51 | March 20, 2001     | 3  | 11 | -170 |
| 52 | March 27, 2001     | 19 | 5  | -78  |
| 53 | March 28, 2001     | 11 | 4  | -110 |
| 54 | March 31, 2001     | 3  | 6  | -429 |
| 55 | April 8, 2001      | 13 | 3  | -83  |
| 56 | April 11, 2001     | 15 | 9  | -303 |
| 57 | April 13, 2001     | 10 | 6  | -101 |
| 58 | April 18, 2001     | 1  | 6  | -151 |
| 59 | April 22, 2001     | 1  | 15 | -126 |
| 60 | May 6, 2001        | 20 | 9  | -57  |
| 61 | May 9, 2001        | 12 | 7  | -92  |
| 62 | June 18, 2001      | 3  | 6  | -89  |
| 63 | August 17, 2001    | 12 | 10 | -140 |
| 64 | September 13, 2001 | 2  | 6  | -80  |
| 65 | September 23, 2001 | 9  | 11 | -97  |
| 66 | September 25, 2001 | 20 | 6  | -131 |
| 67 | September 30, 2001 | 23 | 10 | -173 |
| 68 | October 3, 2001    | 6  | 9  | -187 |
| 69 | October 21, 2001   | 16 | 6  | -227 |
| 70 | October 28, 2001   | 3  | 9  | -184 |
| 71 | October 31, 2001   | 19 | 16 | -125 |
| 72 | November 24, 2001  | 6  | 10 | -247 |
| 73 | December 21, 2001  | 14 | 9  | -87  |
| 74 | December 24, 2001  | 0  | 11 | -80  |
| 75 | December 29, 2001  | 23 | 7  | -84  |
| 76 | January 19, 2002   | 8  | 10 | -60  |
| 77 | February 2, 2002   | 3  | 7  | -111 |
| 78 | February 5, 2002   | 17 | 4  | -114 |
| 79 | March 18, 2002     | 23 | 7  | -60  |
| 80 | March 23, 2002     | 23 | 11 | -125 |
| 81 | March 30, 2002     | 11 | 8  | -61  |
| 82 | April 17, 2002     | 8  | 10 | -136 |
| 83 | April 18, 2002     | 0  | 8  | -144 |
| 84 | April 20, 2002     | 3  | 4  | -179 |
| 85 | April 23, 2002     | 5  | 4  | -90  |

|     |                    |    |    |      |
|-----|--------------------|----|----|------|
| 86  | May 11, 2002       | 10 | 10 | -134 |
| 87  | May 18, 2002       | 20 | 11 | -81  |
| 88  | May 23, 2002       | 11 | 7  | -141 |
| 89  | May 27, 2002       | 3  | 7  | -86  |
| 90  | July 5, 2002       | 22 | 8  | -67  |
| 91  | July 12, 2002      | 7  | 4  | -65  |
| 92  | August 1, 2002     | 10 | 4  | -78  |
| 93  | August 1, 2002     | 23 | 7  | -125 |
| 94  | August 4, 2002     | 1  | 5  | -82  |
| 95  | August 18, 2002    | 21 | 5  | -78  |
| 96  | August 19, 2002    | 19 | 6  | -89  |
| 97  | August 20, 2002    | 18 | 13 | -127 |
| 98  | September 4, 2002  | 2  | 4  | -133 |
| 99  | September 7, 2002  | 16 | 9  | -208 |
| 100 | September 11, 2002 | 12 | 11 | -111 |
| 101 | October 1, 2002    | 7  | 10 | -205 |
| 102 | October 4, 2002    | 3  | 6  | -165 |
| 103 | October 24, 2002   | 13 | 8  | -124 |
| 104 | November 20, 2002  | 16 | 5  | -117 |
| 105 | November 21, 2002  | 2  | 9  | -156 |
| 106 | December 19, 2002  | 7  | 12 | -99  |
| 107 | December 20, 2002  | 21 | 7  | -105 |
| 108 | December 22, 2002  | 20 | 16 | -90  |
| 109 | December 26, 2002  | 21 | 10 | -99  |
| 110 | January 3, 2003    | 14 | 7  | -61  |
| 111 | January 29, 2003   | 18 | 7  | -88  |
| 112 | February 4, 2003   | 1  | 9  | -98  |
| 113 | February 27, 2003  | 13 | 9  | -87  |
| 114 | March 3, 2003      | 15 | 10 | -92  |
| 115 | March 16, 2003     | 16 | 6  | -84  |
| 116 | March 31, 2003     | 6  | 10 | -99  |
| 117 | April 29, 2003     | 12 | 15 | -90  |
| 118 | April 30, 2003     | 21 | 4  | -104 |
| 119 | May 10, 2003       | 0  | 8  | -111 |
| 120 | May 21, 2003       | 16 | 11 | -98  |
| 121 | May 29, 2003       | 18 | 6  | -213 |
| 122 | June 2, 2003       | 2  | 7  | -119 |
| 123 | June 18, 2003      | 5  | 5  | -171 |
| 124 | July 12, 2003      | 2  | 4  | -132 |
| 125 | July 16, 2003      | 3  | 11 | -121 |
| 126 | July 26, 2003      | 16 | 5  | -80  |
| 127 | August 5, 2003     | 22 | 5  | -86  |
| 128 | August 18, 2003    | 1  | 15 | -166 |
| 129 | September 9, 2003  | 18 | 7  | -65  |
| 130 | September 23, 2003 | 22 | 10 | -84  |

|     |                    |    |    |      |
|-----|--------------------|----|----|------|
| 131 | October 14, 2003   | 20 | 3  | -113 |
| 132 | November 4, 2003   | 6  | 5  | -105 |
| 133 | November 20, 2003  | 12 | 9  | -456 |
| 134 | November 22, 2003  | 13 | 10 | -110 |
| 135 | January 15, 2004   | 12 | 5  | -70  |
| 136 | January 22, 2004   | 10 | 4  | -158 |
| 137 | January 23, 2004   | 12 | 6  | -101 |
| 138 | February 11, 2004  | 10 | 8  | -123 |
| 139 | March 9, 2004      | 11 | 13 | -99  |
| 140 | April 3, 2004      | 14 | 11 | -141 |
| 141 | April 5, 2004      | 16 | 4  | -91  |
| 142 | April 23, 2004     | 11 | 5  | -61  |
| 143 | July 16, 2004      | 22 | 5  | -100 |
| 144 | July 22, 2004      | 20 | 7  | -114 |
| 145 | July 25, 2004      | 9  | 8  | -170 |
| 146 | July 26, 2004      | 22 | 5  | -142 |
| 147 | July 27, 2004      | 4  | 10 | -196 |
| 148 | August 30, 2004    | 10 | 13 | -158 |
| 149 | October 12, 2004   | 21 | 11 | -72  |
| 150 | November 7, 2004   | 19 | 12 | -404 |
| 151 | November 9, 2004   | 11 | 5  | -172 |
| 152 | November 9, 2004   | 18 | 4  | -249 |
| 153 | November 10, 2004  | 4  | 6  | -293 |
| 154 | January 7, 2005    | 21 | 4  | -126 |
| 155 | January 12, 2005   | 2  | 6  | -81  |
| 156 | January 17, 2005   | 15 | 3  | -111 |
| 157 | January 17, 2005   | 23 | 3  | -105 |
| 158 | January 21, 2005   | 17 | 6  | -142 |
| 159 | February 17, 2005  | 23 | 4  | -106 |
| 160 | April 4, 2005      | 14 | 13 | -94  |
| 161 | April 11, 2005     | 16 | 14 | -86  |
| 162 | April 29, 2005     | 17 | 5  | -56  |
| 163 | May 8, 2005        | 11 | 8  | -139 |
| 164 | May 15, 2005       | 5  | 4  | -284 |
| 165 | May 20, 2005       | 4  | 4  | -110 |
| 166 | May 30, 2005       | 6  | 8  | -138 |
| 167 | June 4, 2005       | 13 | 8  | -57  |
| 168 | June 12, 2005      | 17 | 8  | -125 |
| 169 | July 9, 2005       | 4  | 15 | -78  |
| 170 | July 10, 2005      | 11 | 10 | -124 |
| 171 | July 17, 2005      | 21 | 10 | -90  |
| 172 | July 27, 2005      | 22 | 8  | -68  |
| 173 | August 24, 2005    | 9  | 3  | -242 |
| 174 | August 31, 2005    | 12 | 8  | -148 |
| 175 | September 15, 2005 | 9  | 8  | -103 |

|     |                    |    |    |      |
|-----|--------------------|----|----|------|
| 176 | October 31, 2005   | 7  | 14 | -96  |
| 177 | December 9, 2005   | 19 | 12 | -52  |
| 178 | January 25, 2006   | 18 | 10 | -73  |
| 179 | March 6, 2006      | 16 | 11 | -76  |
| 180 | April 5, 2006      | 1  | 15 | -106 |
| 181 | April 9, 2006      | 0  | 8  | -103 |
| 182 | April 14, 2006     | 0  | 10 | -121 |
| 183 | April 22, 2006     | 0  | 4  | -68  |
| 184 | May 6, 2006        | 19 | 3  | -82  |
| 185 | July 28, 2006      | 1  | 4  | -78  |
| 186 | August 7, 2006     | 1  | 7  | -80  |
| 187 | August 19, 2006    | 10 | 15 | -107 |
| 188 | September 23, 2006 | 17 | 12 | -77  |
| 189 | November 9, 2006   | 17 | 10 | -93  |
| 190 | November 30, 2006  | 3  | 11 | -95  |
| 191 | December 14, 2006  | 21 | 8  | -185 |
| 192 | January 29, 2007   | 12 | 6  | -77  |
| 193 | March 24, 2007     | 0  | 9  | -90  |
| 194 | April 1, 2007      | 0  | 9  | -90  |
| 195 | May 23, 2007       | 7  | 7  | -80  |
| 196 | July 10, 2007      | 22 | 5  | -58  |
| 197 | July 20, 2007      | 7  | 5  | -54  |
| 198 | October 25, 2007   | 12 | 10 | -74  |
| 199 | November 20, 2007  | 9  | 12 | -82  |
| 200 | March 9, 2008      | 1  | 5  | -114 |
| 201 | March 26, 2008     | 10 | 10 | -73  |
| 202 | June 14, 2008      | 17 | 7  | -60  |
| 203 | July 12, 2008      | 1  | 8  | -58  |
| 204 | September 3, 2008  | 21 | 8  | -73  |
| 205 | October 11, 2008   | 7  | 5  | -79  |
| 206 | July 22, 2009      | 1  | 5  | -111 |
| 207 | August 6, 2009     | 2  | 6  | -60  |
| 208 | May 2, 2010        | 10 | 9  | -99  |
| 209 | May 29, 2010       | 0  | 14 | -98  |
| 210 | August 3, 2010     | 19 | 7  | -103 |
| 211 | October 11, 2010   | 9  | 10 | -100 |
| 212 | January 6, 2011    | 20 | 5  | -68  |
| 213 | February 4, 2011   | 17 | 5  | -92  |
| 214 | February 14, 2011  | 18 | 5  | -65  |
| 215 | March 1, 2011      | 9  | 6  | -115 |
| 216 | March 10, 2011     | 18 | 12 | -103 |
| 217 | April 6, 2011      | 9  | 10 | -82  |
| 218 | April 12, 2011     | 4  | 6  | -70  |
| 219 | May 28, 2011       | 6  | 6  | -104 |
| 220 | August 5, 2011     | 19 | 9  | -143 |

|     |                    |    |    |      |
|-----|--------------------|----|----|------|
| 221 | September 9, 2011  | 13 | 5  | -97  |
| 222 | September 17, 2011 | 7  | 9  | -96  |
| 223 | September 26, 2011 | 15 | 7  | -141 |
| 224 | October 24, 2011   | 21 | 5  | -175 |
| 225 | January 22, 2012   | 7  | 15 | -94  |
| 226 | January 24, 2012   | 15 | 5  | -74  |
| 227 | January 25, 2012   | 8  | 3  | -100 |
| 228 | February 18, 2012  | 20 | 9  | -85  |
| 229 | February 27, 2012  | 12 | 8  | -77  |
| 230 | March 7, 2012      | 4  | 6  | -119 |
| 231 | March 9, 2012      | 1  | 8  | -170 |
| 232 | March 15, 2012     | 14 | 7  | -114 |
| 233 | April 23, 2012     | 17 | 12 | -141 |
| 234 | June 17, 2012      | 0  | 14 | -116 |
| 235 | July 15, 2012      | 0  | 19 | -161 |
| 236 | July 28, 2012      | 13 | 10 | -53  |
| 237 | September 30, 2012 | 23 | 6  | -142 |
| 238 | October 8, 2012    | 19 | 7  | -123 |
| 239 | October 13, 2012   | 1  | 7  | -112 |
| 240 | November 1, 2012   | 3  | 18 | -86  |
| 241 | November 13, 2012  | 23 | 9  | -129 |
| 242 | November 23, 2012  | 22 | 8  | -64  |
| 243 | January 17, 2013   | 13 | 5  | -65  |
| 244 | March 1, 2013      | 8  | 3  | -87  |
| 245 | March 17, 2013     | 6  | 5  | -119 |
| 246 | June 1, 2013       | 1  | 8  | -152 |
| 247 | June 28, 2013      | 12 | 19 | -128 |
| 248 | July 6, 2013       | 0  | 19 | -107 |
| 249 | July 9, 2013       | 21 | 15 | -74  |
| 250 | July 14, 2013      | 12 | 11 | -102 |
| 251 | October 8, 2013    | 20 | 6  | -94  |
| 252 | November 9, 2013   | 1  | 8  | -104 |
| 253 | December 8, 2013   | 0  | 9  | -88  |
| 254 | February 27, 2014  | 17 | 5  | -126 |
| 255 | April 11, 2014     | 17 | 17 | -110 |
| 256 | April 29, 2014     | 20 | 14 | -89  |
| 257 | August 27, 2014    | 3  | 16 | -103 |
| 258 | September 12, 2014 | 19 | 5  | -117 |
| 259 | December 23, 2014  | 19 | 7  | -79  |
| 260 | January 7, 2015    | 7  | 5  | -129 |
| 261 | February 17, 2015  | 20 | 5  | -88  |
| 262 | March 2, 2015      | 1  | 8  | -81  |
| 263 | April 9, 2015      | 22 | 7  | -81  |
| 264 | April 10, 2015     | 23 | 11 | -98  |
| 265 | May 13, 2015       | 0  | 7  | -106 |

|     |                    |    |    |      |
|-----|--------------------|----|----|------|
| 266 | June 8, 2015       | 5  | 4  | -101 |
| 267 | June 22, 2015      | 18 | 3  | -175 |
| 268 | June 23, 2015      | 0  | 5  | -228 |
| 269 | July 13, 2015      | 2  | 10 | -81  |
| 270 | July 23, 2015      | 3  | 6  | -85  |
| 271 | August 15, 2015    | 9  | 4  | -91  |
| 272 | August 23, 2015    | 6  | 3  | -71  |
| 273 | August 26, 2015    | 13 | 9  | -92  |
| 274 | August 27, 2015    | 14 | 7  | -115 |
| 275 | August 28, 2015    | 2  | 8  | -113 |
| 276 | September 9, 2015  | 0  | 13 | -123 |
| 277 | September 20, 2015 | 6  | 6  | -96  |
| 278 | October 7, 2015    | 13 | 10 | -148 |
| 279 | October 18, 2015   | 7  | 3  | -74  |
| 280 | November 6, 2015   | 19 | 12 | -116 |
| 281 | December 14, 2015  | 15 | 5  | -75  |
| 282 | December 20, 2015  | 12 | 11 | -177 |
| 283 | December 31, 2015  | 11 | 5  | -81  |
| 284 | December 31, 2015  | 18 | 7  | -128 |
| 285 | January 20, 2016   | 4  | 13 | -119 |
| 286 | February 2, 2016   | 20 | 7  | -75  |
| 287 | March 6, 2016      | 15 | 7  | -131 |
| 288 | March 14, 2016     | 19 | 13 | -73  |
| 289 | April 2, 2016      | 14 | 10 | -79  |
| 290 | April 7, 2016      | 17 | 8  | -86  |
| 291 | May 21, 2016       | 1  | 8  | -45  |
| 292 | July 20, 2016      | 0  | 8  | -56  |
| 293 | September 1, 2016  | 1  | 9  | -83  |
| 294 | September 19, 2016 | 6  | 5  | -57  |
| 295 | October 13, 2016   | 6  | 12 | -119 |
| 296 | November 10, 2016  | 10 | 8  | -90  |
| 297 | March 27, 2017     | 4  | 11 | -101 |
| 298 | April 4, 2017      | 4  | 4  | -69  |
| 299 | April 19, 2017     | 23 | 6  | -67  |
| 300 | April 21, 2017     | 15 | 7  | -64  |
| 301 | May 27, 2017       | 21 | 11 | -148 |
| 302 | August 4, 2017     | 5  | 10 | -58  |
| 303 | August 31, 2017    | 6  | 6  | -79  |
| 304 | September 7, 2017  | 21 | 5  | -166 |
| 305 | September 12, 2017 | 20 | 5  | -84  |
| 306 | September 14, 2017 | 12 | 9  | -76  |
| 307 | December 4, 2017   | 16 | 6  | -67  |
| 308 | March 9, 2018      | 23 | 8  | -60  |
| 309 | April 20, 2018     | 0  | 10 | -96  |
| 310 | May 5, 2018        | 11 | 8  | -73  |

---

|     |                    |    |    |      |
|-----|--------------------|----|----|------|
| 311 | August 25, 2018    | 14 | 18 | -203 |
| 312 | September 21, 2018 | 21 | 7  | -70  |
| 313 | October 7, 2018    | 10 | 12 | -79  |
| 314 | November 4, 2018   | 9  | 11 | -57  |

---
